# Supplementary material for: Genetic dissection of hippocampal sclerosis of ageing using magnetic resonance imaging surrogates
Source: Research Square preprint supplement (doi:10.21203/rs.3.rs-6429978/v1), 2025-05-13
Supplement: Supplementary file 1 [file 579a26593cd964dadae96fbd.docx]

SUPPLEMENTARY FIGURES

**
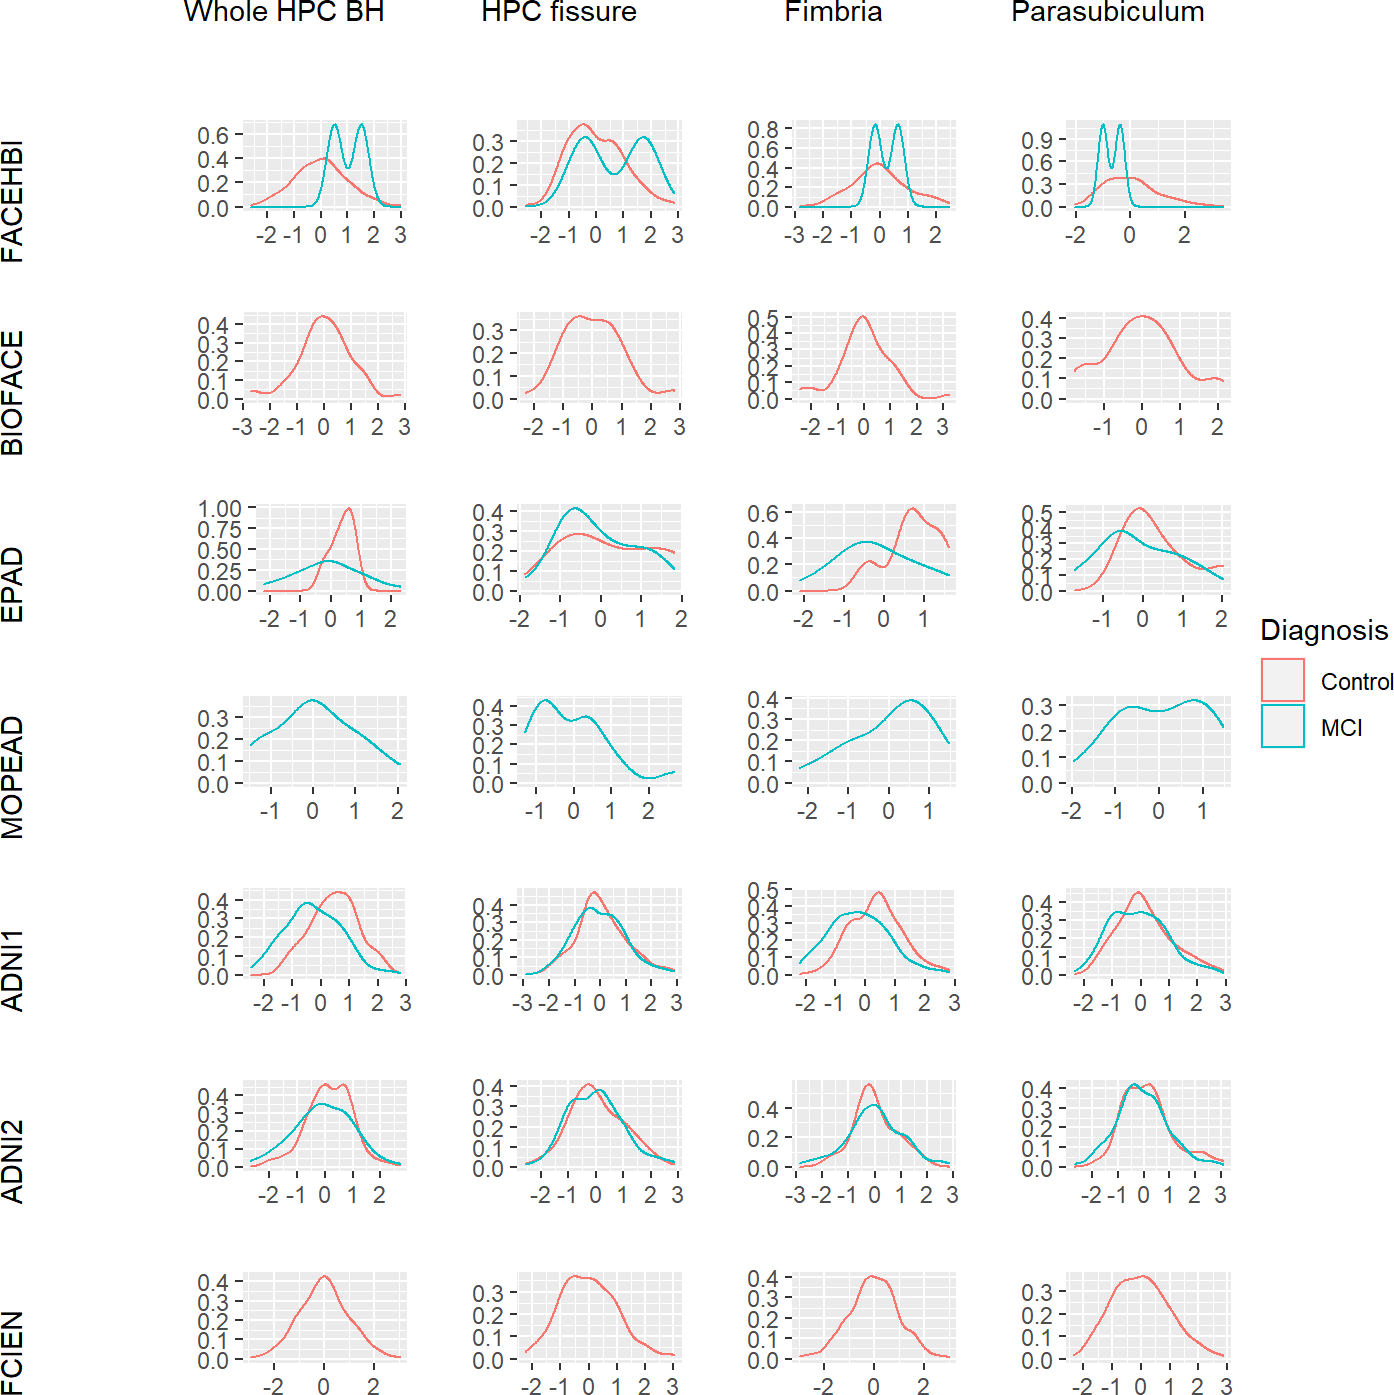
**

**Supplementary Figure 1**. Distribution of the scaled HS-by-proxy phenotypic variables by

project and clinical status. HPC (Hippocampal), BH (body and head), MCI (Mild Cognitive

Impairment).


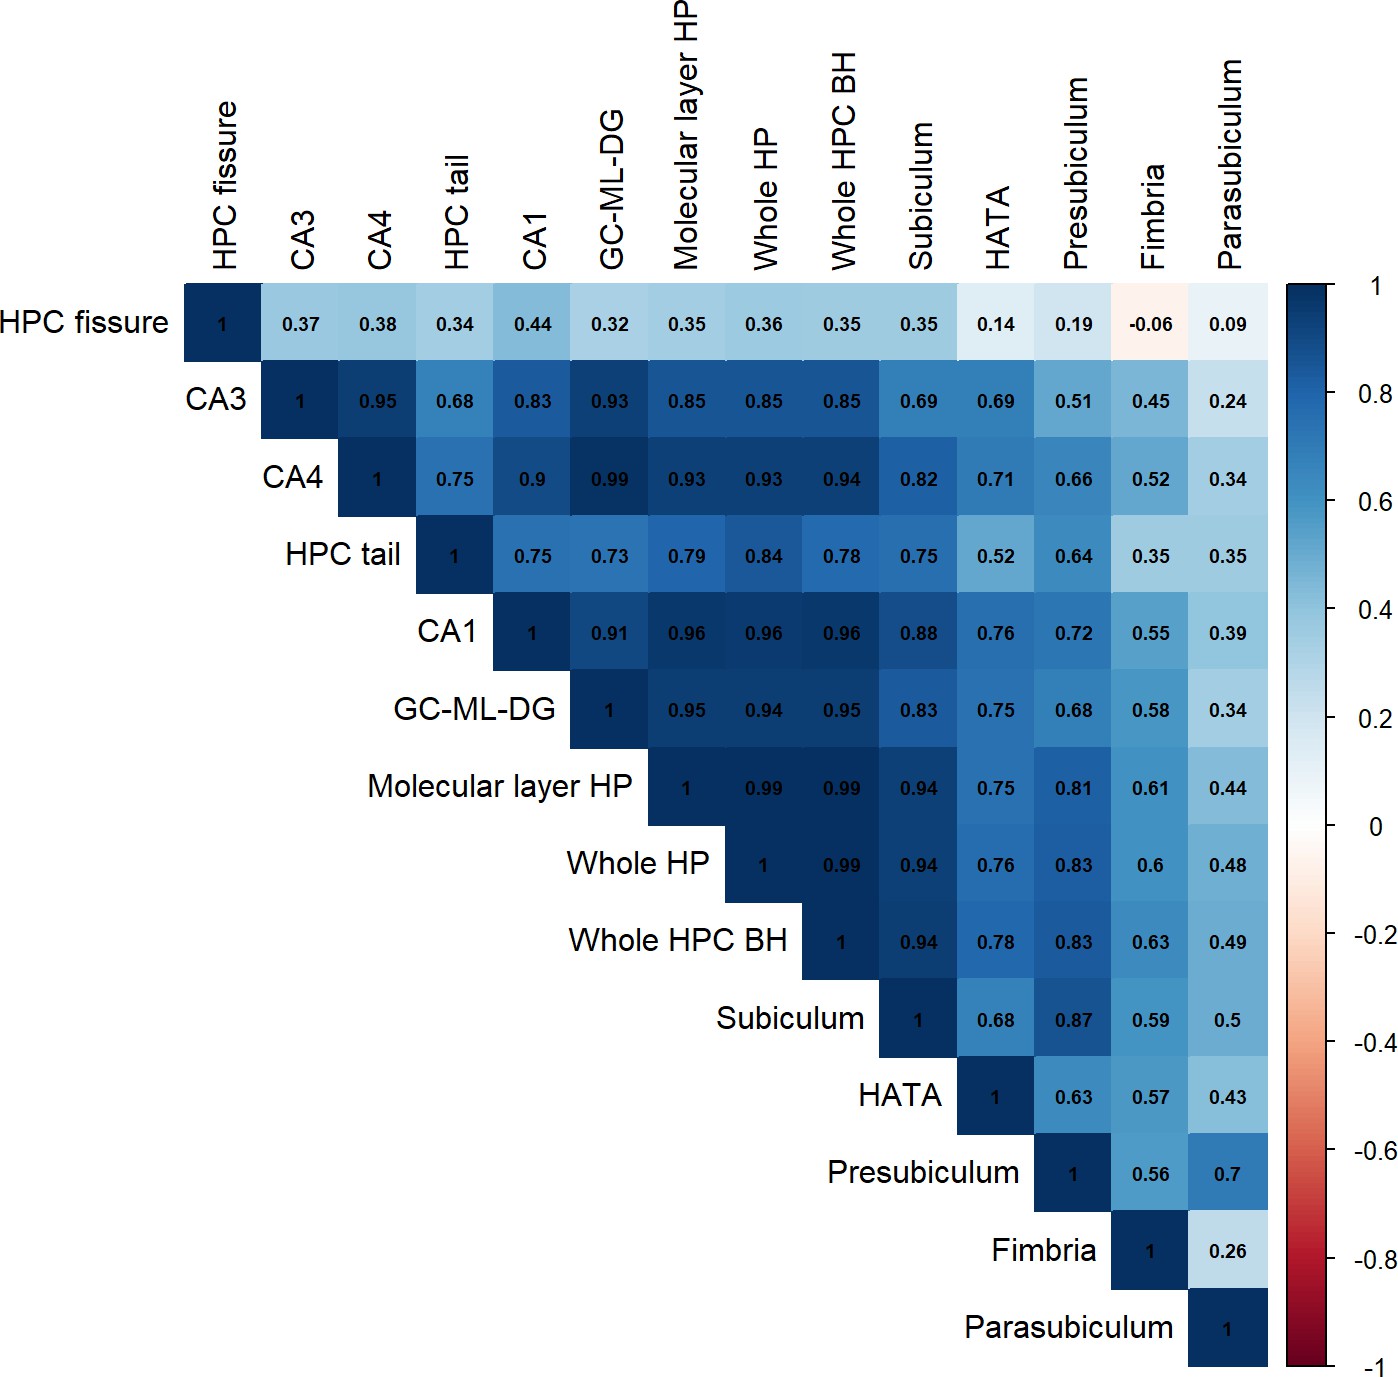


**Supplementary Figure 2**. Hippocampal subregions correlations. HP (Hippocampus), BH (body

and head), HPC (Hippocampal), HATA (hippocampus-amygdala-transition-area), GC-ML-DG

(Granule Cell and Molecular Layer of the Dentate Gyrus), CA (Cornu ammonis).


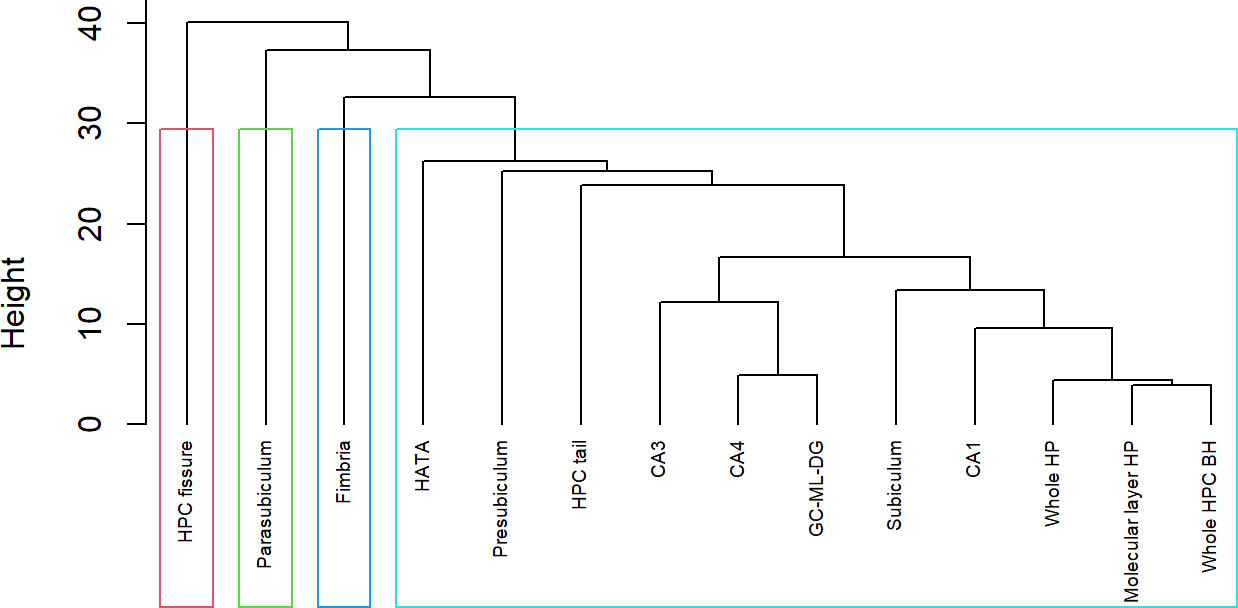


**Supplementary Figure 3**. Cluster dendrogram for hippocampal subfields. HP (Hippocampus),

BH (body and head), HPC (Hippocampal), HATA (hippocampus-amygdala-transition-area), GC-

ML-DG (Granule Cell and Molecular Layer of the Dentate Gyrus), CA (Cornu ammonis).


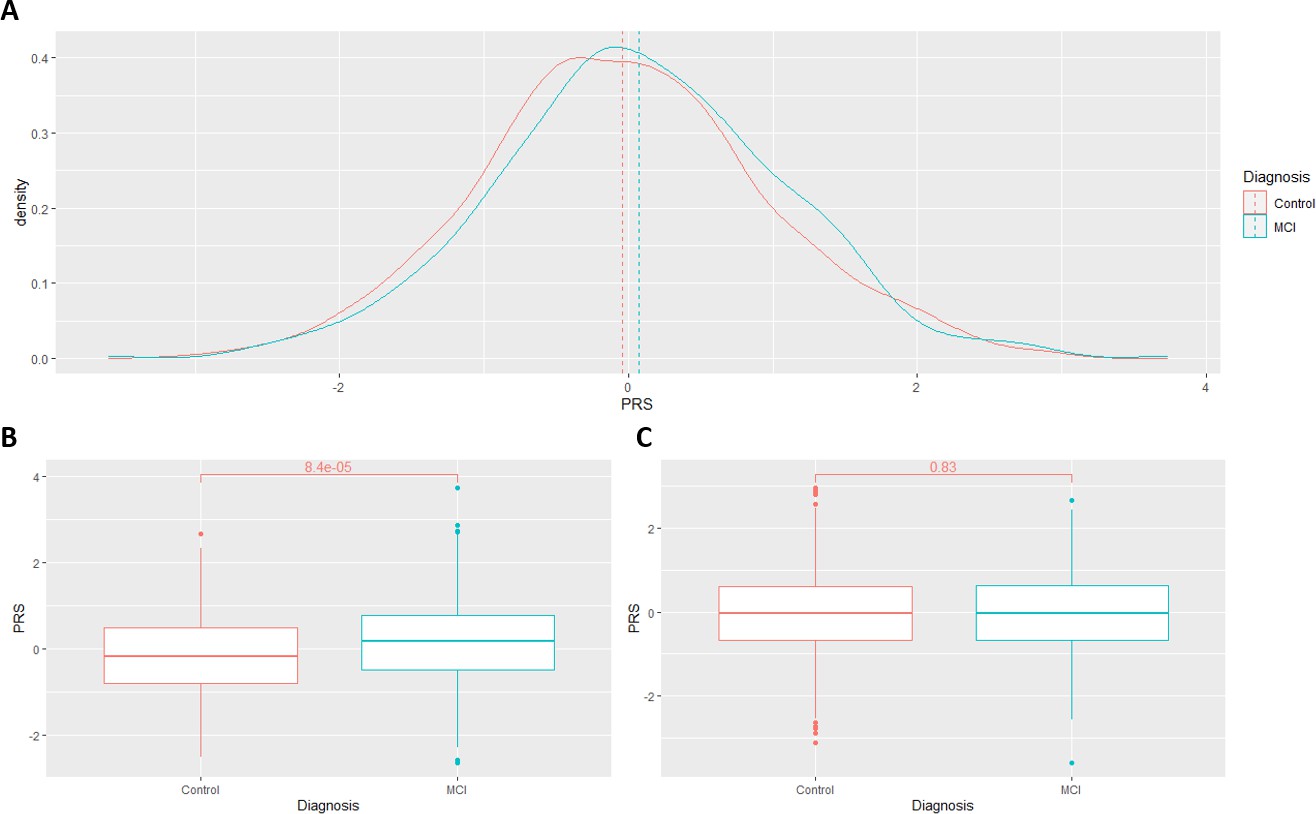


**Supplementary Figure 4**. Distribution of AD-PRS values in mild cognitive impairment (MCI)

compared with control individuals (**A**). In *APOE* ɛ4 carriers (**B**) and *APOE* ɛ4 non-carriers (**C**).


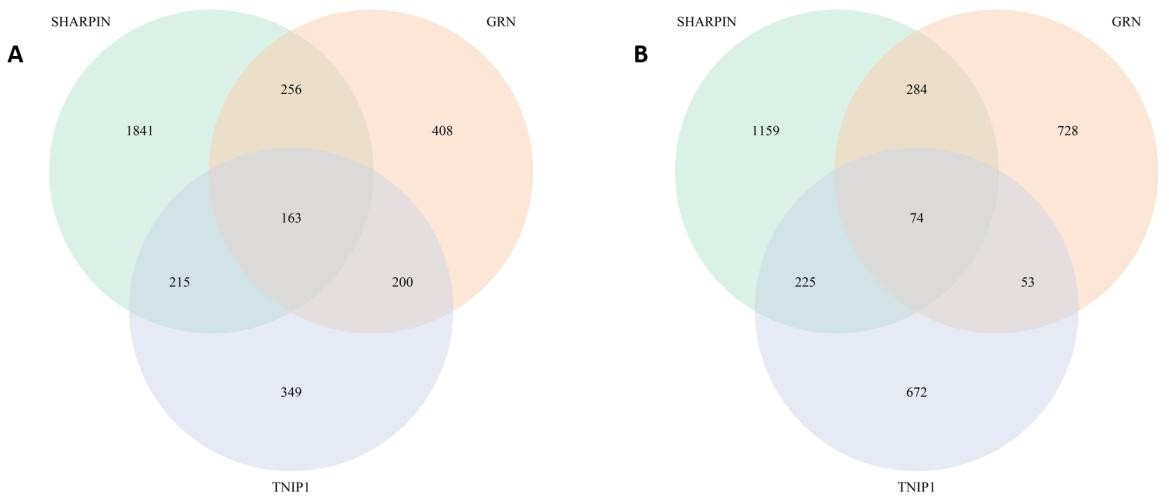


**Supplementary Figure 5**. Venn diagram of the co-expressed genes between *SHARPIN, GRN* and *TNIP1* in brain (**A**) and neuron (**B**).

**SUPPLEMENTARY** **TABLES**

| **Supplementary Table 1**. Impact of covariates in the statistical model for the association of  the AD-PRS with hippocampal BH. | | | |
| --- | --- | --- | --- |
|  | **Estimate** | **SE** | **p -value** |
| (Intercept) | 6.8627344 | 1.7681677 | 0.000108 |
| PRS | -0.0842782 | 0.0187226 | 7.18E-06 |
| PC1 | -0.3458448 | 0.6330494 | 0.584916 |
| PC2 | 0.9129954 | 0.6608337 | 0.16727 |
| PC3 | -0.6613513 | 0.6011743 | 0.271434 |
| PC4 | 1.5058116 | 0.635283 | 0.017877 |
| PC5 | -0.8285646 | 0.6340329 | 0.19144 |
| PC6 | -0.7289584 | 0.6260938 | 0.244457 |
| PC7 | -0.6808985 | 0.6319018 | 0.281382 |
| PC8 | -0.2904233 | 0.6324686 | 0.646152 |
| PC9 | 0.5739908 | 0.6231629 | 0.357124 |
| PC10 | 0.2735863 | 0.627776 | 0.663032 |
| Age | -0.0782817 | 0.0478843 | 0.102262 |
| Age2 | 0.0001048 | 0.000328 | 0.749274 |
| Sex | -0.2269309 | 0.0478285 | 2.25E-06 |
| Education | -0.0047679 | 0.0043629 | 0.274616 |
| Diagnosis | -0.7307481 | 0.0575022 | < 2e-16 |
| EstimatedTotalIntraCranialVol | 0.3899171 | 0.0229901 | < 2e-16 |
| CohortADNI2 | -0.1373313 | 0.0581838 | 0.018365 |
| CohortBIOFACE | -0.5668226 | 0.1286176 | 1.11E-05 |
| CohortEPAD | -0.1561474 | 0.1559392 | 0.316798 |
| CohortFACEHBI | -0.8814088 | 0.0904961 | < 2e-16 |
| CohortFCIEN | -0.4404407 | 0.064014 | 8.18E-12 |
| CohortMOPEAD | 0.1346365 | 0.1860851 | 0.469453 |
| * AD-PRS (Alzheimer's Disease Polygenic Risk Score), BH (body and head), SE (standard error), PC (Principal Component) | | | |

| **Supplementary Table 2**. Impact of covariates in the statistical model for the association of  the AD-PRS with fimbria. | | | |
| --- | --- | --- | --- |
|  | **Estimate** | **SE** | **p-value** |
| (Intercept) | 7.3080599 | 1.9837879 | 0.000236 |
| PRS | -0.069157 | 0.0210276 | 0.001025 |
| PC1 | -0.9339095 | 0.7104256 | 0.188817 |
| PC2 | 1.1491311 | 0.7419849 | 0.121621 |
| PC3 | 0.1857082 | 0.6737084 | 0.782848 |
| PC4 | -0.1148797 | 0.7129228 | 0.872002 |
| PC5 | 0.5518891 | 0.7116173 | 0.43812 |
| PC6 | -0.0037581 | 0.702996 | 0.995735 |
| PC7 | -0.2322511 | 0.709413 | 0.743414 |
| PC8 | -0.8244041 | 0.7097222 | 0.245555 |
| PC9 | 0.776818 | 0.6993964 | 0.266845 |
| PC10 | -0.4668388 | 0.7047037 | 0.50776 |
| Age | -0.0955454 | 0.0537231 | 0.075492 |
| Age2 | 0.0001592 | 0.000368 | 0.665351 |
| Sex | -0.0340669 | 0.0537976 | 0.526655 |
| Education | -0.0067138 | 0.0048999 | 0.170793 |
| Diagnosis | -0.5389243 | 0.0645266 | < 2e-16 |
| EstimatedTotalIntraCranialVol | 0.1210715 | 0.0258564 | 3.04E-06 |
| CohortADNI2 | -0.197091 | 0.0652525 | 0.002559 |
| CohortBIOFACE | -0.8358005 | 0.1451733 | 1.00E-08 |
| CohortEPAD | -0.2820212 | 0.1749988 | 0.107231 |
| CohortFACEHBI | -0.9464415 | 0.1015777 | < 2e-16 |
| CohortFCIEN | -0.3892324 | 0.0719203 | 7.06E-08 |
| CohortMOPEAD | -0.0097748 | 0.2088322 | 0.962672 |
| * AD-PRS (Alzheimer's Disease Polygenic Risk Score), SE (standard error), PC (Principal Component) | | | |

| **Supplementary Table 3.** Biological processes enriched by loci in cluster A identified with STRING. | | | | | | |  |  |
| --- | --- | --- | --- | --- | --- | --- | --- | --- |
| **term ID** | **term description** | **observed gene count** | **background gene count** | **strength** | **false discovery rate** |
| GO:0048519 | Negative regulation of biological process | 12 | 5313 | 0.53 | 0.0229 |
| GO:0097039 | Protein linear polyubiquitination | 2 | 3 | 3 | 0.0314 |

**Supplementary Table 4**. Biological processes enriched by loci in cluster B identified with STRING**.**

| **term ID** | **term description** | **observ**  **ed gene count** | **backgrou**  **nd gene count** | **strengt h** | **false**  **discove ry rate** |
| --- | --- | --- | --- | --- | --- |
| GO:00018 19 | Positive regulation of cytokine production | 7 | 482 | 1.46 | 9.79E-  06 |
| GO:00326 75 | Regulation of interleukin-6 production | 4 | 151 | 1.72 | 0.0029 |
| GO:00192  20 | Regulation of phosphate metabolic  process | 7 | 1405 | 0.99 | 0.003 |
| GO:00026  84 | Positive regulation of immune system  process | 6 | 874 | 1.13 | 0.0031 |
| GO:00099  67 | Positive regulation of signal  transduction | 7 | 1525 | 0.96 | 0.0031 |
| GO:00313 99 | Regulation of protein modification process | 7 | 1560 | 0.95 | 0.0031 |
| GO:00459 37 | Positive regulation of phosphate metabolic process | 6 | 912 | 1.11 | 0.0031 |
| GO:00507  31 | Positive regulation of peptidyl-tyrosine  phosphorylation | 4 | 194 | 1.61 | 0.0031 |
| GO:00512  47 | Positive regulation of protein metabolic  process | 7 | 1512 | 0.96 | 0.0031 |
| GO:19029  96 | Regulation of neurofibrillary tangle  assembly | 2 | 3 | 3.12 | 0.0031 |
| GO:00314  01 | Positive regulation of protein  modification process | 6 | 1018 | 1.06 | 0.0033 |
| GO:00421 16 | Macrophage activation | 3 | 62 | 1.98 | 0.0033 |
| GO:00712 16 | Cellular response to biotic stimulus | 4 | 232 | 1.53 | 0.0033 |
| GO:00512  39 | Regulation of multicellular organismal  process | 8 | 2749 | 0.76 | 0.0037 |
| GO:00019  32 | Regulation of protein phosphorylation | 6 | 1108 | 1.03 | 0.0038 |
| GO:00513  47 | Positive regulation of transferase  activity | 5 | 586 | 1.23 | 0.0038 |
| GO:00615  18 | Microglial cell proliferation | 2 | 8 | 2.69 | 0.0065 |
| GO:00324 96 | Response to lipopolysaccharide | 4 | 314 | 1.4 | 0.0072 |
| GO:00019  34 | Positive regulation of protein  phosphorylation | 5 | 747 | 1.12 | 0.0083 |
| GO:00027  32 | Positive regulation of dendritic cell  cytokine production | 2 | 11 | 2.55 | 0.0083 |
| GO:00327  55 | Positive regulation of interleukin-6  production | 3 | 98 | 1.78 | 0.0083 |
| GO:00458  07 | Positive regulation of endocytosis | 3 | 99 | 1.78 | 0.0083 |
| GO:00517  07 | Response to other organism | 6 | 1328 | 0.95 | 0.0083 |
| GO:00435 49 | Regulation of kinase activity | 5 | 778 | 1.1 | 0.0086 |
| GO:00022  52 | Immune effector process | 4 | 375 | 1.32 | 0.0093 |

| GO:00106  46 | Regulation of cell communication | 8 | 3355 | 0.67 | 0.0093 |
| --- | --- | --- | --- | --- | --- |
| GO:00230  51 | Regulation of signaling | 8 | 3367 | 0.67 | 0.0093 |
| GO:19029  47 | Regulation of tau-protein kinase activity | 2 | 13 | 2.48 | 0.0093 |
| GO:19059 07 | Negative regulation of amyloid fibril formation | 2 | 13 | 2.48 | 0.0093 |
| GO:00601 00 | Positive regulation of phagocytosis, engulfment | 2 | 14 | 2.45 | 0.0097 |
| GO:00096  05 | Response to external stimulus | 7 | 2355 | 0.77 | 0.0099 |
| GO:00507  76 | Regulation of immune response | 5 | 844 | 1.07 | 0.0099 |
| GO:01500  78 | Positive regulation of  neuroinflammatory response | 2 | 15 | 2.42 | 0.0099 |
| GO:00106  04 | Positive regulation of macromolecule  metabolic process | 8 | 3533 | 0.65 | 0.0103 |
| GO:00432 54 | Regulation of protein-containing complex assembly | 4 | 413 | 1.28 | 0.0104 |
| GO:00027 05 | Positive regulation of leukocyte mediated immunity | 3 | 138 | 1.63 | 0.0112 |
| GO:00313  33 | Negative regulation of protein-  containing complex assembly | 3 | 142 | 1.62 | 0.0116 |
| GO:00440  93 | Positive regulation of molecular  function | 6 | 1587 | 0.87 | 0.0116 |
| GO:19024  30 | Negative regulation of amyloid-beta  formation | 2 | 18 | 2.34 | 0.0116 |
| GO:00022 81 | Macrophage activation involved in immune response | 2 | 19 | 2.32 | 0.0118 |
| GO:00303 34 | Regulation of cell migration | 5 | 927 | 1.03 | 0.0118 |
| GO:19002  21 | Regulation of amyloid-beta clearance | 2 | 19 | 2.32 | 0.0118 |
| GO:00321  03 | Positive regulation of response to  external stimulus | 4 | 453 | 1.24 | 0.0124 |
| GO:19002  25 | Regulation of NLRP3 inflammasome  complex assembly | 2 | 20 | 2.29 | 0.0124 |
| GO:00025  77 | Regulation of antigen processing and  presentation | 2 | 21 | 2.27 | 0.0131 |
| GO:00326 80 | Regulation of tumor necrosis factor production | 3 | 164 | 1.56 | 0.0143 |
| GO:19025 31 | Regulation of intracellular signal transduction | 6 | 1726 | 0.84 | 0.0143 |
| GO:19025  33 | Positive regulation of intracellular  signal transduction | 5 | 997 | 0.99 | 0.0143 |
| GO:00336  74 | Positive regulation of kinase activity | 4 | 494 | 1.2 | 0.0151 |
| GO:00485  83 | Regulation of response to stimulus | 8 | 3931 | 0.6 | 0.0151 |
| GO:00303 35 | Positive regulation of cell migration | 4 | 529 | 1.17 | 0.0184 |
| GO:00066 22 | Protein targeting to lysosome | 2 | 28 | 2.15 | 0.0187 |

| GO:00606  27 | Regulation of vesicle-mediated transport | 4 | 551 | 1.16 | 0.0211 |
| --- | --- | --- | --- | --- | --- |
| GO:00017  74 | Microglial cell activation | 2 | 31 | 2.1 | 0.0219 |
| GO:00714  02 | Cellular response to lipoprotein particle  stimulus | 2 | 31 | 2.1 | 0.0219 |
| GO:00712 19 | Cellular response to molecule of bacterial origin | 3 | 205 | 1.46 | 0.0229 |
| GO:00453 21 | Leukocyte activation | 4 | 574 | 1.14 | 0.023 |
| GO:00457  32 | Positive regulation of protein catabolic  process | 3 | 214 | 1.44 | 0.0244 |
| GO:00327  33 | Positive regulation of interleukin-10  production | 2 | 40 | 1.99 | 0.031 |
| GO:00508  50 | Positive regulation of calcium-mediated  signaling | 2 | 42 | 1.97 | 0.0324 |
| GO:00327  35 | Positive regulation of interleukin-12  production | 2 | 43 | 1.96 | 0.0335 |
| GO:00458 59 | Regulation of protein kinase activity | 4 | 663 | 1.07 | 0.034 |
| GO:00434 08 | Regulation of MAPK cascade | 4 | 668 | 1.07 | 0.0341 |
| GO:00069  55 | Immune response | 5 | 1321 | 0.87 | 0.0366 |
| GO:00511  29 | Negative regulation of cellular  component organization | 4 | 691 | 1.06 | 0.038 |
| GO:00071  65 | Signal transduction | 8 | 4714 | 0.52 | 0.0408 |
| GO:00069 52 | Defense response | 5 | 1394 | 0.85 | 0.0447 |
| GO:00482 60 | Positive regulation of receptor-mediated endocytosis | 2 | 55 | 1.86 | 0.0484 |
| GO:00486  78 | Response to axon injury | 2 | 56 | 1.85 | 0.0497 |

**Supplementary Table 5**. Biological processes enriched by loci in cluster C identified with STRING**.**

| **term ID** | **term description** | **observ ed gene**  **count** | **backgro und gene**  **count** | **stren gth** | **false discov ery**  **rate** |
| --- | --- | --- | --- | --- | --- |
| GO:0010 813 | Neuropeptide catabolic process | 3 | 4 | 2.42 | 0.0064 |
| GO:0050  435 | Amyloid-beta metabolic process | 4 | 18 | 1.89 | 0.0064 |
| GO:0030 334 | Regulation of cell migration | 13 | 927 | 0.69 | 0.0087 |
| GO:0002 252 | Immune effector process | 8 | 375 | 0.88 | 0.0095 |
| GO:0002  684 | Positive regulation of immune system process | 12 | 874 | 0.68 | 0.0095 |
| GO:0006  897 | Endocytosis | 9 | 447 | 0.85 | 0.0095 |
| GO:0007  166 | Cell surface receptor signaling pathway | 18 | 2040 | 0.49 | 0.0095 |
| GO:0010 815 | Bradykinin catabolic process | 3 | 7 | 2.18 | 0.0095 |
| GO:0023 052 | Signaling | 30 | 5057 | 0.32 | 0.0095 |
| GO:0030  335 | Positive regulation of cell migration | 10 | 529 | 0.82 | 0.0095 |
| GO:0043  085 | Positive regulation of catalytic activity | 14 | 1191 | 0.62 | 0.0095 |
| GO:0044  093 | Positive regulation of molecular function | 16 | 1587 | 0.55 | 0.0095 |
| GO:0045  807 | Positive regulation of endocytosis | 5 | 99 | 1.25 | 0.0095 |
| GO:0048 518 | Positive regulation of biological process | 34 | 6207 | 0.28 | 0.0095 |
| GO:0051 094 | Positive regulation of developmental process | 14 | 1332 | 0.57 | 0.0095 |
| GO:0051  239 | Regulation of multicellular organismal  process | 21 | 2749 | 0.43 | 0.0095 |
| GO:0051  240 | Positive regulation of multicellular  organismal process | 16 | 1505 | 0.57 | 0.0095 |
| GO:0060  100 | Positive regulation of phagocytosis,  engulfment | 3 | 14 | 1.88 | 0.0095 |
| GO:0060 627 | Regulation of vesicle-mediated transport | 10 | 551 | 0.81 | 0.0095 |
| GO:0150 094 | Amyloid-beta clearance by cellular catabolic process | 3 | 8 | 2.12 | 0.0095 |
| GO:1902 959 | Regulation of aspartic-type endopeptidase activity involved in amyloid precursor protein catabolic process | 3 | 11 | 1.98 | 0.0095 |
| GO:1902  991 | Regulation of amyloid precursor protein  catabolic process | 4 | 44 | 1.5 | 0.0095 |
| GO:0065 009 | Regulation of molecular function | 22 | 3085 | 0.4 | 0.0097 |
| GO:0007  165 | Signal transduction | 28 | 4714 | 0.32 | 0.0106 |

| GO:2000  026 | Regulation of multicellular organismal  development | 14 | 1389 | 0.55 | 0.0127 |
| --- | --- | --- | --- | --- | --- |
| GO:1902  430 | Negative regulation of amyloid-beta  formation | 3 | 18 | 1.77 | 0.0128 |
| GO:0030  100 | Regulation of endocytosis | 6 | 209 | 1 | 0.0143 |
| GO:1900 221 | Regulation of amyloid-beta clearance | 3 | 19 | 1.74 | 0.0143 |
| GO:0002 682 | Regulation of immune system process | 14 | 1438 | 0.53 | 0.0165 |
| GO:0007  154 | Cell communication | 29 | 5165 | 0.3 | 0.0171 |
| GO:0051  345 | Positive regulation of hydrolase activity | 9 | 589 | 0.73 | 0.0171 |
| GO:1901  076 | Positive regulation of engulfment of apoptotic  cell | 2 | 2 | 2.55 | 0.018 |
| GO:0010  646 | Regulation of cell communication | 22 | 3355 | 0.36 | 0.0233 |
| GO:0043 410 | Positive regulation of MAPK cascade | 8 | 481 | 0.77 | 0.0233 |
| GO:0043 549 | Regulation of kinase activity | 10 | 778 | 0.66 | 0.0233 |
| GO:0045  785 | Positive regulation of cell adhesion | 8 | 485 | 0.76 | 0.0233 |
| GO:0048  522 | Positive regulation of cellular process | 30 | 5584 | 0.28 | 0.0233 |
| GO:0050  790 | Regulation of catalytic activity | 18 | 2370 | 0.43 | 0.0233 |
| GO:0002 274 | Myeloid leukocyte activation | 5 | 150 | 1.07 | 0.0239 |
| GO:0010 628 | Positive regulation of gene expression | 12 | 1146 | 0.57 | 0.0239 |
| GO:0010  814 | Substance P catabolic process | 2 | 3 | 2.37 | 0.0239 |
| GO:0010  875 | Positive regulation of cholesterol efflux | 3 | 26 | 1.61 | 0.0239 |
| GO:0065  005 | Protein-lipid complex assembly | 3 | 26 | 1.61 | 0.0239 |
| GO:1902 960 | Negative regulation of aspartic-type endopeptidase activity involved in amyloid  precursor protein catabolic process | 2 | 3 | 2.37 | 0.0239 |
| GO:0051  049 | Regulation of transport | 15 | 1763 | 0.48 | 0.0253 |
| GO:0050  865 | Regulation of cell activation | 9 | 658 | 0.68 | 0.0272 |
| GO:0050 730 | Regulation of peptidyl-tyrosine phosphorylation | 6 | 259 | 0.91 | 0.0273 |
| GO:0097 066 | Response to thyroid hormone | 3 | 29 | 1.56 | 0.0273 |
| GO:0043  408 | Regulation of MAPK cascade | 9 | 668 | 0.68 | 0.0285 |
| GO:0045  595 | Regulation of cell differentiation | 14 | 1582 | 0.49 | 0.0285 |
| GO:0051  716 | Cellular response to stimulus | 32 | 6357 | 0.25 | 0.0285 |

| GO:0002  316 | Follicular B cell differentiation | 2 | 4 | 2.25 | 0.0292 |
| --- | --- | --- | --- | --- | --- |
| GO:0050  776 | Regulation of immune response | 10 | 844 | 0.62 | 0.0292 |
| GO:0050  793 | Regulation of developmental process | 18 | 2492 | 0.4 | 0.0292 |
| GO:0050 794 | Regulation of cellular process | 45 | 11025 | 0.16 | 0.0292 |
| GO:0051 336 | Regulation of hydrolase activity | 11 | 1011 | 0.58 | 0.0292 |
| GO:0051  604 | Protein maturation | 6 | 275 | 0.89 | 0.0315 |
| GO:0050  867 | Positive regulation of cell activation | 7 | 401 | 0.79 | 0.0326 |
| GO:0019  222 | Regulation of metabolic process | 33 | 6784 | 0.23 | 0.0339 |
| GO:1902  905 | Positive regulation of supramolecular fiber  organization | 5 | 175 | 1 | 0.0339 |
| GO:0038 027 | Apolipoprotein A-I-mediated signaling pathway | 2 | 5 | 2.15 | 0.0343 |
| GO:0045 917 | Positive regulation of complement activation | 2 | 5 | 2.15 | 0.0343 |
| GO:0051  130 | Positive regulation of cellular component  organization | 11 | 1049 | 0.57 | 0.0343 |
| GO:0045  597 | Positive regulation of cell differentiation | 10 | 876 | 0.6 | 0.0347 |
| GO:0043  254 | Regulation of protein-containing complex  assembly | 7 | 413 | 0.78 | 0.0355 |
| GO:0032 879 | Regulation of localization | 16 | 2103 | 0.43 | 0.036 |
| GO:1902 107 | Positive regulation of leukocyte differentiation | 5 | 181 | 0.99 | 0.036 |
| GO:0050  777 | Negative regulation of immune response | 5 | 185 | 0.98 | 0.0378 |
| GO:0061  097 | Regulation of protein tyrosine kinase activity | 4 | 99 | 1.15 | 0.0383 |
| GO:0010  647 | Positive regulation of cell communication | 14 | 1693 | 0.46 | 0.0389 |
| GO:0023  051 | Regulation of signaling | 21 | 3367 | 0.34 | 0.0389 |
| GO:0045 321 | Leukocyte activation | 8 | 574 | 0.69 | 0.0389 |
| GO:0048 523 | Negative regulation of cellular process | 26 | 4736 | 0.29 | 0.0389 |
| GO:0048  584 | Positive regulation of response to stimulus | 16 | 2131 | 0.42 | 0.0389 |
| GO:0050  789 | Regulation of biological process | 46 | 11655 | 0.14 | 0.0389 |
| GO:0051  246 | Regulation of protein metabolic process | 18 | 2622 | 0.38 | 0.0389 |
| GO:1903 898 | Negative regulation of PERK-mediated unfolded protein response | 2 | 6 | 2.07 | 0.0389 |
| GO:0031 334 | Positive regulation of protein-containing complex assembly | 5 | 193 | 0.96 | 0.0392 |

| GO:0016  192 | Vesicle-mediated transport | 12 | 1298 | 0.51 | 0.0397 |
| --- | --- | --- | --- | --- | --- |
| GO:0050  731 | Positive regulation of peptidyl-tyrosine  phosphorylation | 5 | 194 | 0.96 | 0.0397 |
| GO:0051  347 | Positive regulation of transferase activity | 8 | 586 | 0.68 | 0.0398 |
| GO:0070 050 | Neuron cellular homeostasis | 3 | 41 | 1.41 | 0.0409 |
| GO:0051 247 | Positive regulation of protein metabolic process | 13 | 1512 | 0.48 | 0.0413 |
| GO:1902  531 | Regulation of intracellular signal transduction | 14 | 1726 | 0.46 | 0.0413 |
| GO:0052  547 | Regulation of peptidase activity | 7 | 446 | 0.74 | 0.0422 |
| GO:0002  694 | Regulation of leukocyte activation | 8 | 601 | 0.67 | 0.0448 |

| **Supplementary Table 6**. Top ten pathways ranked based on FDR threshold enriched by co-  expressed genes between *SHARPIN, GRN* and *TNIP1* in brain (N = 163) identified by ORA with WebGestalt. | | | | | |
| --- | --- | --- | --- | --- | --- |
| **Gene Set** | **Description** | **Expect** | **Ratio** | **P-value** | **FDR** |
| hsa0414 1 | Protein processing in endoplasmic reticulum | 1.82 | 7.16 | 2.22 × 10-08 | **7.25 × 10-06** |
| hsa0051 1 | Other glycan degradation | 0.20 | 20.20 | 3.70 × 10-05 | **6.03 × 10-03** |
| hsa0414 2 | Lysosome | 1.35 | 5.91 | 5.59 × 10-05 | **6.07 × 10-03** |
| hsa0516  9 | Epstein-Barr virus  infection | 2.21 | 4.07 | 3.34 × 10-04 | **2.73 × 10-02** |
| hsa0516  3 | Human cytomegalovirus  infection | 2.48 | 3.64 | 7.61 × 10-04 | **4.96 × 10-02** |
| hsa0466  2 | B cell receptor signaling  pathway | 0.78 | 6.40 | 1.05 × 10-03 | **5.70 × 10-02** |
| hsa0517 0 | Human immunodeficiency virus 1 infection | 2.33 | 3.43 | 2.19 × 10-03 | 1.02 × 10-01 |
| hsa0516 2 | Measles | 1.45 | 4.13 | 3.20 × 10-03 | 1.20 × 10-01 |
| hsa0465  8 | Th1 and Th2 cell  differentiation | 1.01 | 4.94 | 3.31 × 10-03 | 1.20 × 10-01 |
| hsa0513  1 | Shigellosis | 0.72 | 5.59 | 5.53 × 10-03 | 1.71 × 10-01 |
| * Significant FDR (FDR ≤ 0.05) in bold.  † Expect (number of expected genes in the pathway), Ratio (enrichment ratio), FDR (False Discovery Rate). | | | | | |

| **Supplementary Table 7.** KEGG pathways significantly enriched by co-expressed genes between *SHARPIN*, *GRN* and *TNIP1* in brain (N = 163) found in the STRING  database. | | | |
| --- | --- | --- | --- |
| **Term ID** | **Description** | **Strength** | **FDR** |
| hsa00511 | Other glycan degradation | 1.43 | 3.00E-03 |
| hsa00600 | Sphingolipid metabolism | 1.02 | 2.60E-02 |
| hsa04141 | Protein processing in endoplasmic reticulum | 0.99 | 6.84E-07 |
| hsa04142 | Lysosome | 0.89 | 2.20E-03 |
| hsa04662 | B cell receptor signaling pathway | 0.89 | 2.45E-02 |
| hsa05162 | Measles | 0.80 | 9.80E-03 |
| hsa05164 | Influenza A | 0.78 | 5.30E-03 |
| hsa05169 | Epstein-Barr virus infection | 0.76 | 3.30E-03 |
| hsa05163 | Human cytomegalovirus infection | 0.65 | 2.45E-02 |
| hsa05131 | Shigellosis | 0.65 | 2.45E-02 |
| * Strength (Enrichment Effect = log10(observed / expected)), FDR (False Discovery Rate). | | | |

**SUPPLEMENTARY** **METHODS**

**The Vallecas Project**

The Vallecas Project is a single-centre longitudinal community-based study, currently in its eighth year. Genetic testing was conducted at baseline visit, and yearly clinical, neuropsychological, and MRI assessments remain ongoing. Inclusion and exclusion criteria have been described previously. From a pool of 1213 participants, additional criteria were set, including only those with MRI scanning and without a diagnosis of MCI or dementia, leaving a total of 916 participants on the first visit for cross-sectional analyses, of which 729 had GAWAS data or polymorphisms of interest. All participants provided written informed consent. The Vallecas project was approved by the Ethics Committee of the Instituto de Salud Carlos III.

**ADNI 1**

The ADNI was launched in 2003 as a public-private partnership, led by Principal Investigator Michael W. Weiner, MD. The primary goal of ADNI has been to test whether serial MRI, positron emission tomography (PET), other biological markers, and clinical and neuropsychological assessment can be combined to measure the progression of MCI and early AD.

The first phase of ADNI was designed to find more sensitive and accurate biomarkers for the early detection and tracking of AD. This study was based on thousands of brain scans, genetic profiles, blood and cerebrospinal fluid biomarkers and brain imaging measures including structural MRI and PET from a total of 800 individuals diagnosed with mild cognitive impairment (MCI), early AD and elderly control subjects including 200 elderly control subjects, 400 individuals diagnosed with mild cognitive impairment (MCI) and 200 with early Alzheimer’s disease (AD). This study developed improved methods that create uniform standards for acquiring longitudinal, multi-site MRI and PET data on patients with AD, MCI and elderly controls and therefore provides maximum power to determine treatment effects. Moreover, it acquired a generally accessible data repository which describes longitudinal changes in brain structure and metabolism as well as clinical/cognitive and biomarker data for the validation of imaging surrogates.

**ADNI GO**

The ADNI GO study followed the ADNI1 project defining and characterizing the stage of the AD spectrum that precedes MCI by enrolling 200 subjects in the mildest symptomatic phase of AD (EMCI). It includes 500 elderly controls and MCI (rollover from ADNI1), 200 subjects in the mildest symptomatic phase of AD (EMCI) (new for ADNI GO). This study performed F18 amyloid imaging on the CN and LMCI subjects from ADNI1 and the newly enrolled EMCI subjects. FDG PET was performed in association with F18 amyloid imaging. ADNI GO

established a national network for F18 amyloid imaging and test hypotheses concerning the prevalence and severity of brain amyloid accumulation and its relationship to current and previous changes of clinical state, MRI, FDG-PET, CSF and plasma biomarkers from ADNI1. Collected 3T MRI on all newly enrolled subjects at Baseline, Month 3, Month 6, and Month 12. Continued longitudinal clinical/cognitive and 1.5T MRI studies of approximately 500 LMCI and Cognitively Normal subjects from ADNI1 for an additional 2 years. Collected and analyzed blood and CSF biomarkers from all newly enrolled EMCI and follow-up subjects. Collected blood samples for DNA and RNA extraction. Newly enrolled subjects will also have samples collected for Cell Immortalization and APOE genotyping.

**ADNI2**

The purpose of ADNI2 was to examine how brain imaging and other biomarkers can be used to measure the progression of mild cognitive impairment (MCI) and early Alzheimer's disease. Together with previous studies ADNI1 and ADNI-GO, ADNI2 seek to determine the relationships among brain imaging results, biomarkers, and clinical, cognitive, and genetic characteristics of the entire spectrum of Alzheimer's as it evolves from normal aging through dementia. The overall goals are increased knowledge concerning the sequence and timing of events leading to MCI and Alzheimer's disease, better methods for early detection of these conditions, and data that informs clinical trials aimed at slowing disease progression. This study includes 150 normal controls (new for ADNI2), 450-500 CN and MCI (rollover from ADNI1), 150 Early Mild Cognitive Impairment (EMCI; new for ADNI2), 200 EMCI (rollover from ADNI GO), 150 Late Mild Cognitive Impairment (LMCI; new for ADNI2) and 200 mild AD (new for ADNI2).

This study determined the relationships among clinical, imaging, genetic, and biochemical biomarker characteristics of the entire spectrum of Alzheimer’s disease (AD) as the pathology evolves. Informed the neuroscience of AD, identified diagnostic and prognostic markers and outcome measures that can be used in clinical trials, and helped develop the most effective clinical trial scenarios. Developed uniform standards for acquiring longitudinal multisite MRI and PET data on patients with AD, MCI, and elderly controls. Performed longitudinal clinical, cognitive, MRI, PET (18F-Florbetapir and FDG), and blood and CSF biomarker studies on 550 newly enrolled subjects in addition to continuing these studies for approximately 700 subjects from ADNI1 and ADNI GO for an additional 5 years. Collected blood samples for DNA and RNA extraction. Newly enrolled subjects will also have samples collected for Cell Immortalization and APOE genotyping. Validated the clinical diagnoses and imaging and biomarker surrogates through neuropathological examination of ADNI1, ADNI GO, and ADNI2 participants who come to autopsy.

**BIOFACE**

BIOFACE is a two-year study of clinical, cognition, and biomarkers in individuals with early- onset mild cognitive impairment (age <65-yo) carried out at Ace Alzheimer Center Barcelona. The study goal is to characterize the different phenotypes from a clinical, neuropsychological, and biomarker point of view and to investigate the cerebrospinal fluid (CSF) and plasma proteomics as well as the role of neuronal-derived plasma exosomes (NPEs) as early biomarkers of AD. Participants underwent extended neurological and neuropsychological batteries, multimodal biomarkers including brain MRI, blood, saliva, CSF, anthropometric, and neuro- ophthalmological examinations.

**EPAD**

The European Prevention of Alzheimer's Dementia (EPAD) is a European collaborative research to expand knowledge about the first stages of Alzheimer's and thus prevent dementia before symptoms appear. EPAD is made up of 38 European institutions, including research centers, universities, European pharmaceutical laboratories and patient associations. The objective of EPAD is to develop an infrastructure that allows carrying out concept tests to accelerate early decision making in the development of candidate drugs and their possible combinations to prevent Alzheimer's disease.

**FACEHBI**

Fundació ACE Healthy Brain Initiative (FACEHBI) is a longitudinal study of biomarkers, risk factors, lifestyle and cognition in a cohort of 200 individuals with Subjective Cognitive Decline (SCD) carried out a Ace Alzheimer Center Barcelona since 2014. SCD refers to the self- perception of cognitive problems, including memory loss, without impairment on standardized cognitive tests (Jessen et al. 2014, Mitchell et al. 2014). Participants undergo annual follow-ups with comprehensive neurological exam and cognitive battery. Additionally, at v0, v2, v5 and v8 a longer assessment is performed including self-administered questionnaires, neuroimaging with brain MRI, amyloid positron emission tomography (PET) and retinal optical coherence tomography (OCT) and blood, cerebrospinal fluid and fecal sample collection.

**MOPEAD**

The MOPEAD (Models of Patient Engagement for Alzheimer's Disease) project is a European initiative that aimed to give the citizen an active role in the early detection of Alzheimer's disease. MOPEAD was funded by IMI (Innovative Medicines Initiative) - public-private partnership between the EU and the European Federation of Pharmaceutical Industry Associations (EFPIA). MOPEAD was led by ACE and included the participation of Eli Lilly Company Ltd, ASDM Consulting, and AstraZeneca AB. The European Institute of Women's Health, GMV Soluciones

Globales Internet SAU, Karolinska Institute, KITE Innovation (Europe) Ltd, Spomincica- Alzheimer Slovenia, Cologne University Hospital, Ljubljana University Medical Center, Vall D'Hebron-Institut University Hospital Recerca, Stichting VUmc and Alzheimer Europe. The objective of MOPEAD was to sensitize citizens and increase their participation in the diagnostic process of AD, which also helped in identifying unknown cases. In particular, the project tested the effectiveness of four different models of citizen participation (an online questionnaire, ACE´s Open House Initiative, a test conducted by primary care physicians and a cognitive test for patients diagnosed with type 2 diabetes).

NTB-Clinic-FRCB-IDIBAPS

The Neurological Tissue Bank (NTB) at Hospital Clínic-FRCB-IDIBAPS (Fundació de Recerca Clínic Barcelona-Institut d’Investigacions Biomèdiques August Pi i Sunyer) contains a repository of preserved nervous tissue samples that are sourced from deceased patients throughout Catalonia. It is focused on neurodegenerative diseases and currently holds nervous tissue from over 2,300 donors. This study included 332 patients with neuropathological confirmation of Alzheimer's disease.
